# Supplementary material
Source: PubMed Central journal article supplement (PMC6643614)
Supplement: ao6b00390_si_001.pdf [file ao6b00390_si_001.pdf]

**Supporting Information For**

**Peptide Au Cluster Probe: Precisely Detecting Epidermal Growth  
Factor Receptor of Three Tumor Cell Lines at a Single-Cell Level**

Jiao Zhai,<sup>†</sup> Lina Zhao,<sup>†</sup> Lingna Zheng,<sup>†</sup> Fuping Gao,<sup>†</sup> Liang Gao,<sup>†</sup> Ru liu,<sup>†</sup> Yaling  
Wang,<sup>†</sup> and Xueyun Gao<sup>\*†,§</sup>

<sup>†</sup> Key Laboratory for Biomedical Effects of Nanomaterials and Nanosafety, Institute of High Energy Physics, Chinese Academy of Sciences, Beijing, 100049, China; Fax: 86-10-88236456; Tel: 86-10-88236709; E-mail: gaoxy@ihep.ac.cn.

<sup>§</sup> Department of Chemistry and Chemical Engineering, Beijing University of Technology, Beijing, 100124, China; E-mail: gaoxy@ihep.ac.cn.

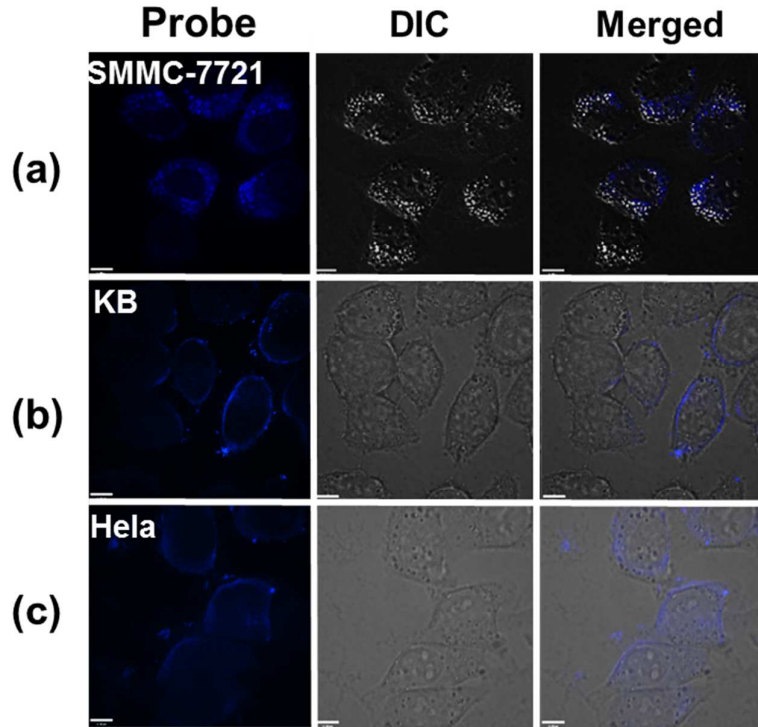

**Figure S1** Location study of Au<sub>3</sub>Peptide<sub>3</sub> Probe in SMMC-7721, KB and Hela cells. Confocal fluorescence images of (a) SMMC-7721, (b) KB and (c) Hela cells exposed to Au<sub>3</sub>Peptide<sub>3</sub> probe.

**Table S1 Operating Conditions for LA-ICP-MS**

| ICP Parameters                   |                      |
|----------------------------------|----------------------|
| Nebulizer Gas Flow (L/min)       | 0.88                 |
| Auxiliary Gas Flow (L/min)       | 0.9                  |
| Plasma Gas Flow (L/min)          | 18                   |
| ICP RF Power                     | 1600                 |
| Analog Stage Voltage             | -1700                |
| Pulse Stage Voltage              | 900                  |
| Isotope monitored                | $^{197}\text{Au}$    |
| LA system                        |                      |
| Laser wavelength                 | 213 nm (Nd: YAG)     |
| Laser ablation method            | Single spot analysis |
| He carrier gas flow rate/ L/min  | 0.8                  |
| Laser Fluence, J/cm <sup>2</sup> | 0.96                 |
| Laser Power Setting, %           | 40                   |
| Repetition Frequency, HZ         | 5                    |

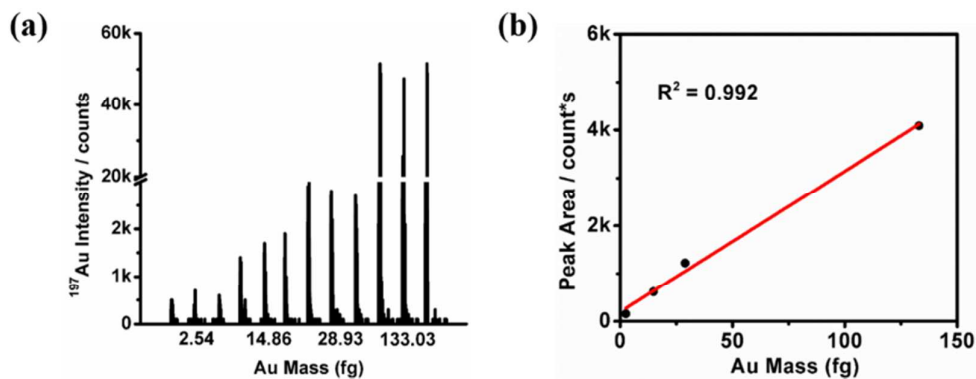

**Figure S2** (a) Transient Au signal obtained by LA-ICP-MS from droplet residues of Au standards (2.54, 14.86, 28.93, 133.03 fg) on a glass slide. (b) Standard curve from Au standards in figure S2a.
